# Supplementary material for: Improving fire severity prediction in south-eastern Australia using vegetation specific information
Source: Copernicus journal article supplement (doi:10.5194/nhess-2023-69), 2023-05-10
Supplement: Supplementary file [file nhess-2023-69-AC1-supplement.pdf]

1 Dear authors, your work focused on the possibility of improving fire severity prediction through  
2 specific vegetation information and indexes in a wildfire-affected area in south-eastern Australia.  
3 The work is generally well written and I found it interesting.

4 **Respond:** We appreciate the reviewer’s constructive comments on the manuscript to further  
5 improve the quality and the contribution of our work. Below are the authors’ responses on all of  
6 the reviewer’s questions and suggestions. The reviewer’s comments are marked as **red**, while  
7 our responses are marked as **blue**.

8 In any case, different issues need to be considered in your revision:

- 9 • I have a first comment about the main focus on fire severity that characterizes your  
10 research: fire behavior (that is also described by fire severity), also depends on several  
11 other factors that jointly influence it over time. In particular, even if a brief discussion  
12 about it is presented in lines 355-363, I suggest better clarifying this issue, especially  
13 explaining the relevance of considering all these factors together in fire behavior  
14 analysis. For instance, no reference to the importance of the vertical structure of  
15 forested areas (DBH, Canopy Cover, CBH, CBD) in this kind of analysis is proposed  
16 in the manuscript. Please improve the respective section of the paper by looking at  
17 these suggestions.

18 Respond: Thanks for the suggestions. We realize that vegetation structure can play an  
19 important role in fire behavior and it is a limitation of this study that did not include  
20 vegetation structure in the fire severity model. We consider this a future development  
21 based on some recent satellite data on vegetation height, which can extend the  
22 application of this model. We have added discussion in the revised paper regarding this  
23 point.

24 From line 416 to 427 in the revised manuscript:

25 “One limitation of this study is that it does not consider the vegetation vertical structure  
26 parameters in the fire severity model, which have been shown to influence fire behavior.  
27 Agee (1996) showed that manipulating forest structure can help to reduce the severity  
28 of fire events, e.g., by reducing the crown bulk density the high severity fire would be  
29 effectively limited. Fang et al. (2015) evaluated the influences and relative importance  
30 of fire weather, topography, and vegetation structure on fire size and fire severity, which  
31 showed fire weather was the dominant driving factor for fire size, while vegetation  
32 structure exerted stronger influences on fire severity. The study by Fernández-Guisuraga  
33 et al. (2021) indicated that severe ecosystem damage was mainly driven by vegetation  
34 structure rather than topography, for example high canopy density was the main driver  
35 of high burn severity. Detailed and accurate vegetation structure data require extensive  
36 field inventory and thus are mostly regionally restricted. With the development of Global  
37 Ecosystem Dynamics Investigation (GEDI) project, it is possible to derive reliable forest  
38 vertical structure parameters from satellite with relatively high spatial resolution and  
39 global coverage (Dubayah et al., 2020). An extension of this study should incorporate

40 data from GEDI into the fire severity model, which would represent an advancement in  
41 understanding and predicting the impact of wildfires.”

42 Agee, James K. (1996). "The influence of forest structure on fire behavior." In  
43 Proceedings of the 17th annual forest vegetation management conference, pp. 52-68.

44 Fang, L., Yang, J., Zu, J., Li, G. and Zhang, J., (2015). Quantifying influences and  
45 relative importance of fire weather, topography, and vegetation on fire size and fire  
46 severity in a Chinese boreal forest landscape. Forest Ecology and Management, 356,  
47 pp.2-12.

48 Fernández-Guisuraga, J.M., Suárez-Seoane, S., García-Llamas, P. and Calvo, L.,  
49 (2021). Vegetation structure parameters determine high burn severity likelihood in  
50 different ecosystem types: A case study in a burned Mediterranean landscape. Journal  
51 of environmental management, 288, p.112462.

52 Dubayah, R., Blair, J.B., Goetz, S., Fatoyinbo, L., Hansen, M., Healey, S., Hofton, M.,  
53 Hurr, G., Kellner, J., Luthcke, S. and Armston, J., 2020. The Global Ecosystem  
54 Dynamics Investigation: High-resolution laser ranging of the Earth's forests and  
55 topography. Science of remote sensing, 1, p.100002.

56 • Lines 114: here you mention the use of Sentinel 2 together with Landsat 8 data in  
57 obtaining pre-NBR. Why did you use both and how you considered the different  
58 resolutions of band products in your analysis is not clear or evidenced. Please clarify it  
59 by adding an explanation in the methodology section, specifying what satellite data  
60 you considered, when, and why also considering the post-processing procedure  
61 followed in L8 /S2 data-elaboration. In this regard, you should also improve the  
62 Discussion by focusing on other research based on satellite data processing and use in  
63 fire-behavior analysis.

64 Respond: To pre-process NBR data, we apply a cloud- and snow-masking algorithm to  
65 remove any snow, clouds, and their shadows from all Landsat imagery. Therefore,  
66 there will be many blank pixels with NaN value within the fire boundary. To fill the  
67 gaps, we adopt the pixel value from the Sentinel-2 image available in the same period.  
68 We have added the steps on how to obtain the dNBR image.

69 From line 112 to line 120 in the revised manuscript:

70 “The calculation of a dNBR-image is described as follows: (1) determine an individual  
71 fire from NPWS Fire History; (2) collect the most recent Landsat images based on the  
72 tags demarcating the start and end times of each individual fire; (3) apply a cloud- and  
73 snow-masking algorithm to remove snow, clouds, and their shadows from all imagery  
74 based on each sensor's pixel quality assessment band; (4) use the auxiliary satellite  
75 images (e.g., Sentinel-2) to fill the blank pixels in the cloud-free images from step (3) to  
76 obtain the pre and post NBR composites; (5) subtract pre- and post-NBR images to  
77 create a dNBR composite with the smallest possible cloud and shadow extent. The

78 dNBR typically ranges from -2 to +2, with high positive values indicating severe burn  
79 damage where the vegetation has been completely consumed. Values around zero  
80 suggest either unburned areas or areas where the fire had a very low impact. Negative  
81 values can indicate an increase in vegetation, which might be due to vegetation recovery  
82 over time or errors in the analysis.”

83

- 84 • Line 168: why did you choose to consider 20 subsets of fire samples? Please justify  
85 this choice.

86 Respond: The reason we have 20 subsets of fire samples is that we derived the dNBR  
87 and the associated variables from the largest wildfire of each year from 2000 to 2019. In  
88 this way, we keep the balance between the sample size and the sample representative in  
89 the model.

90 From line 195 to line 197 in the revised manuscript:

91 “The fire samples from 2000 to 2019 are firstly divided into 20 subsets depending on  
92 the year the fire occurred, and this holdout method is repeated 20 times. Each subset  
93 represents the samples from the wildfire with the largest burn area in the corresponding  
94 year.”

- 95 • Lines 41-54 should be moved to Discussion, where a comparison between your work  
96 and other research is needed looking at your paper outline and workflow.

97 Respond: Thanks for this suggestion. After discussing with the coauthors, we think we  
98 are doing the literature review in this paragraph. So we will keep these sentences in the  
99 introduction section.

100

- 101 • Please improve the final part of the Discussion citing the possibility to use also  
102 different data and tools (such as LiDAR or UAV-based multi-spectral data) in forest  
103 fire behavior analysis.

104 Respond: We have added a paragraph emphasizing the application of LiDAR and  
105 UAV in forest fire management in the revised paper.

106 From line 460 to line 465 in the revised manuscript:

107 “With the rapid development of new technologies such as LiDAR and Unmanned  
108 Aerial Vehicle (UAV), integration of data from these platforms can represent a  
109 promising avenue to enhance our understanding and management of wildfires. LiDAR  
110 technology, with its capability to produce high-resolution vegetation structural and  
111 topography information could facilitate the accurate modelling of fire severity (Hudak

112 et al., 2012; Hébert et al., 2017). On the other hand, the agility and precision of UAVs  
113 in data collection enable real-time monitoring of fire spreading, which significantly  
114 enhances our ability to map burn areas in real-time (Véga et al., 2018; Zheng et al.,  
115 2019). “

116 Hudak, A. T., Strand, E. K., Vierling, L. A., Byrne, J. C., Eitel, J. U., & Martinuzzi, S.  
117 2012. Quantifying aboveground forest carbon pools and fluxes from repeat LiDAR  
118 surveys. *Remote Sensing of Environment*, 123, 25-40.

119 Hébert, F., & Mallet, C. 2017. Forest fire severity assessment using LiDAR in a  
120 Mediterranean environment. *Remote Sensing*, 9(9), 908.

121 Véga, C., Martín, M. P., López, F. J., García, A. M., & Pérez, J. A. (2018). Fire spread  
122 and vegetation monitoring by using a UAV system. *Drones*, 2(4), 31.

123 Zheng, D., Jiang, Y., & Cheng, T. (2019). UAV-based remote sensing technology in  
124 the rapid monitoring of forest fires. *International Journal of Remote Sensing*, 40(11),  
125 4257-4275.

126 • There are no clear pieces of evidence about future challenges starting from your  
127 research. Please enrich the Conclusion in this regard.

128 Respond: We have added sentences addressing the future challenges of the study.

129 From line 487 to line 489 in the revised manuscript:

130 “Future challenges of this study include incorporating different variables, such as  
131 refined topography as well as weather and vegetation structure, from various data  
132 source to improve the accuracy of fire severity prediction, and scaling up the  
133 application of the developed model globally.”

134 Other minor comments are reported below:

135 • line 17: what did you mean by "fire weather"? please clarify

136 Respond: The fire weather means the weather condition during the fire season, like  
137 wind speed, air temperature, humidity. We have clarified it in the revised paper.

138 In line 17 in the revised manuscript:

139 “which is further used to predict fire severity using antecedent drought conditions, fire  
140 weather (i.e., wind speed, air temperature and atmospheric humidity), and topography  
141 of the fire season (November to March).”

142 • line 17: "topography *during* the fire season". Specify the duration of the fire season  
143 and add a reference (what months were considered as fire season?)

144 Respond: Fire season in Australia refers to the period of the year when wildfires, also  
145 known as bushfires in Australia. The fire season in the southern parts of the country,  
146 including regions such as New South Wales, Victoria, South Australia, and Tasmania,  
147 generally peaks during the warmer months, from late spring through to early autumn  
148 (approximately November to March). This is when the vegetation has dried out, and hot,  
149 dry, and often windy conditions prevail, making it easier for fires to start and spread  
150 rapidly.

151 From line 59 to line 62 in the revised manuscript:

152 “One such region is the southeast coast of Australia which is subject to annual fire  
153 seasons (from November to March, Collins et al., 2022) vary in extent and severity and  
154 has a high richness of endemic plant species adapted to particular fire regimes (Gallagher  
155 et al., 2021).”

156 Collins, L., Clarke, H., Clarke, M.F., McColl Gausden, S.C., Nolan, R.H., Penman, T.  
157 and Bradstock, R., 2022. Warmer and drier conditions have increased the potential for  
158 large and severe fire seasons across south-eastern Australia. *Global Ecology and*  
159 *Biogeography*, 31(10), pp.1933-1948.

160 Gallagher, R. V., Allen, S., Mackenzie, B. D., Yates, C. J., Gosper, C. R., Keith, D. A.,  
161 ... & Auld, T. D. (2021). High fire frequency and the impact of the 2019–2020 megafires  
162 on Australian plant diversity. *Diversity and Distributions*, 27(7), 1166-1179.

163 ● line 22: "forecasting /forecast" repetition. Please change one term

164 Respond: We use forecast throughout the paper.

165 ● line 40: add a reference

166 Respond: A reference has been added for dNBR

167 Keeley, J.E., 2009. Fire intensity, fire severity and burn severity: a brief review and  
168 suggested usage. *International journal of wildland fire*, 18(1), pp.116-126.

169 ● Figure 1: increase the size of the legend. Is also not clear if colors are only related to  
170 the years or also depends on fire extension (since polygons in the figure are different  
171 colored but have also different size). Please specify

172 Respond: We have redesigned the figure to make it clearer.

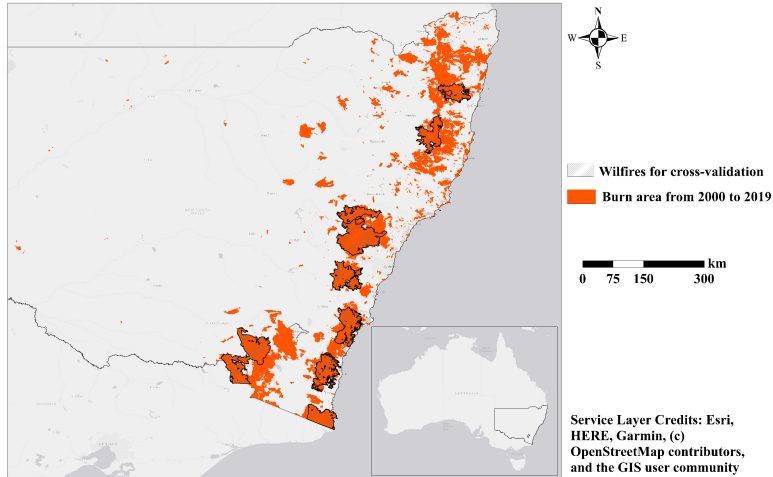

173

174

175

176

Figure 1. Locations of study wildfired over New South Wales (NSW), Australia. The burn area is from NSW National Parks and Wildlife Service (NPWS) Fire History – Wildfire and Prescribed Burns dataset.

177

- line 95, eq.1: add a reference about dNBR equation

178

Respond: A reference has been added.

179

180

Keeley, J.E., 2009. Fire intensity, fire severity and burn severity: a brief review and suggested usage. *International journal of wildland fire*, 18(1), pp.116-126.

181

- line 119: is there a repetition of "DEM"? Please clarify since is not clear

182

Respond: We apologize for the mistake, we have removed the repetition of DEM.

183

184

- line 124: "wildfire environment": what did you mean with "environment"? Please clarify and rephrase the sentence

185

Respond: We apologize for the confusion, we have rewritten this sentence.

186

“In addition to fuels and terrain, weather is another important factor in wildfires.”

187

- lines 206-213 and line 221: change "figure 2" with "figure 3"

188

Respond: We have revised it accordingly.

189

- Figure 3: increase the size of legends

190

Respond: We have revised it accordingly.

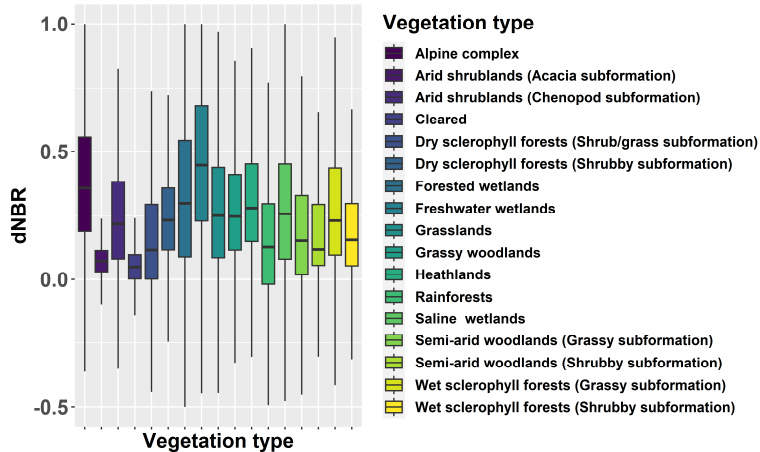

191

192

- line 223: add space "were\_collected"

193

Respond: We have revised it accordingly.

194

195

- line 231: "Note that" seems quite colloquial, why not change it with something like "is important to consider that" or similar?

196

Respond: Thanks for the suggestion. We have changed this sentence to

197

198

“It is important to be aware that the classification step is merely used to improve the consecutive regression accuracy, rather than the final severity categorization result”

199

- lines 227-231: is not clear how the different percentages were adopted

200

Respond: We have clarified this in the method section.

201

From line 162 to line 167 in the revised manuscript:

202

203

204

205

206

207

208

“The dNBR of all burnt pixels for each vegetation type are collected and a set of dNBR values at the quantiles varying from 5% to 35% representing the threshold for low severity classification, quantiles varying from 35% to 65% representing the threshold for moderate severity classification, and quantiles varying from 65% to 95% representing the threshold for high severity classification. For example, a classified burn severity sample can be obtained using the thresholds for high, moderate, and low severity at 85% quantile, 55% quantile and 25% quantile, respectively.”

209

- Figure 4: legends and descriptions are too small

210

Respond: We have increased the size accordingly.

OOB estimate of error rate at 0.95 quantile for high severity classification

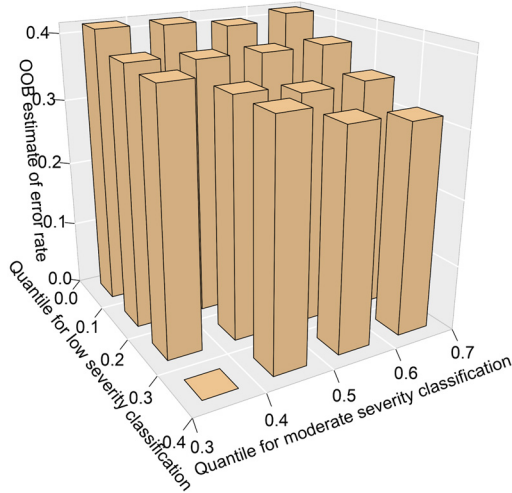

211

- Figure 5: as Figure 4

213 Respond: We have revised it accordingly.

- Figure 6: remove the term "The" in the caption

215 Respond: We have revised it accordingly.

- Figure 9: legends and items are too small

217 Respond: We have increased the size accordingly.

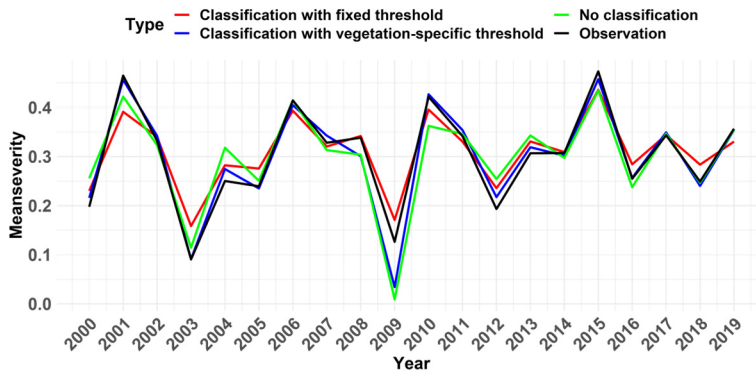

218

- lines 338-339: repetition of "method", please rephrase

220 Respond: We have removed the repetition word.

- line 366: "mis-classification" or "misclassification"?

221



222            Respond: It should be “misclassification”

223            • line 370: add space: "the\_2002"

224            Respond: We have revised it accordingly.

225

226    Good work and best regards

227
